1  
2  
3  
4 Dry heat sterilization as a method to recycle N95 respirator masks: the importance of fit  
5  
6

7 John G. Yuen<sup>1†</sup>, Amy C. Marshlok<sup>2,3,4,†</sup>, Peter Todd Benziger<sup>5,6</sup>, Shan Yan<sup>2,3</sup>, Jeronimo Cello<sup>5,6</sup>, Chavis A.  
8 Stackhouse<sup>3,4</sup>, Kim Kisslinger<sup>4</sup>, David C. Bock<sup>2,3</sup>, Esther S. Takeuchi<sup>2,3,7</sup>, Kenneth J. Takeuchi<sup>2,3,7</sup>, Lei  
9 Wang<sup>2,3</sup>, Sruthi Babu<sup>1</sup>, Glen Itzkowitz<sup>9</sup>, David Thanassi<sup>5,6</sup>, Daniel A. Knopf<sup>10\*</sup>, Kenneth R. Shroyer<sup>1\*</sup>  
10

11 **AFFILIATIONS:**

12 <sup>1</sup> Department of Pathology, Renaissance School of Medicine, Stony Brook University, Stony Brook, New York,  
13 United States of America  
14 <sup>2</sup> Interdisciplinary Science Department, Brookhaven National Laboratory, Upton, New York, United States of  
15 America  
16 <sup>3</sup> Institute for Electrochemically Stored Energy, Stony Brook University, Stony Brook, New York, United States of  
17 America  
18 <sup>4</sup> Department of Chemistry, Stony Brook University, Stony Brook, New York, United States of America  
19 <sup>5</sup> Department of Microbiology and Immunology, Stony Brook University, Stony Brook, New York, United States  
20 of America  
21 <sup>6</sup> Center for Infectious Diseases, Stony Brook University, Stony Brook, New York, United States of America  
22 <sup>7</sup> Center for Functional Nanomaterials, Brookhaven National Laboratory, Upton, New York, United States of  
23 America  
24 <sup>8</sup> Department of Materials Science and Chemical Engineering, Stony Brook University, Stony Brook, New York,  
25 United States of America  
26 <sup>9</sup> Office of the Dean, Renaissance School of Medicine, Stony Brook University, Stony Brook, New York, United  
27 States of America  
28 <sup>10</sup> School of Marine and Atmospheric Sciences, Stony Brook University, New York, United States of America  
29

30 \* Corresponding authors

31 E-mail: [Daniel.Knopf@stonybrook.edu](mailto:Daniel.Knopf@stonybrook.edu), [Kenneth.Shroyer@stonybrookmedicine.edu](mailto:Kenneth.Shroyer@stonybrookmedicine.edu)  
32

33 <sup>†</sup>These authors contributed equally to this work.  
34  
35  
36  
37

## 38 Abstract

39 In times of crisis, including the current COVID-19 pandemic, the supply chain of filtering facepiece respirators,  
40 such as N95 respirators, are disrupted. To combat shortages of N95 respirators, many institutions were forced  
41 to decontaminate and reuse respirators. While several reports have evaluated the impact on filtration as a  
42 measurement of preservation of respirator function after decontamination, the equally important fact of  
43 maintaining proper fit to the users' face has been understudied. In the current study, we demonstrate the  
44 complete inactivation of SARS-CoV-2 and preservation of fit test performance of N95 respirators following  
45 treatment with dry heat. We apply scanning electron microscopy with energy dispersive X-ray spectroscopy  
46 (SEM/EDS), X-ray diffraction (XRD) measurements, Raman spectroscopy, and contact angle measurements to  
47 analyze filter material changes as a consequence of different decontamination treatments. We further  
48 compared the integrity of the respirator after autoclaving versus dry heat treatment via quantitative fit testing  
49 and found that autoclaving, but not dry heat, causes the fit of the respirator onto the users face to fail, thereby  
50 rendering the decontaminated respirator unusable. Our findings highlight the importance to account for both  
51 efficacy of disinfection and mask fit when reprocessing respirators to for clinical redeployment.

## 52 Introduction

53 The transmission of SARS-CoV-2, the etiologic agent of COVID-19, is predominantly by aerosol,  
54 therefore N95 respirators, which are intended to exclude 95 percent of particulates in the size range that  
55 encompasses most aerosolized viral droplets, including SARS-CoV-2, are recommended for protection of  
56 health care providers during patient encounters (1, 2). During the COVID-19 pandemic, the supply chain of  
57 personal protective equipment (PPE) for healthcare workers was pushed to its limit (3, 4), necessitating the  
58 implementation of various protocols for the reuse of PPE by healthcare facilities throughout the world (10). The  
59 Centers of Disease Control and Prevention (CDC) in the United States recently issued additional guidance for  
60 the reuse of filtering facepiece respirators (FFR), such as N95 respirators, when there are shortages of  
61 respirator masks at healthcare facilities (5).

62 While fomite transmission of SARS-CoV-2 is unlikely to be a major source of virus transmission in the  
63 general population, minimizing its risk in healthcare workers is still an important consideration (6). SARS-CoV-  
64 2 surface stability is affected by multiple factors, including the material that it contacts, the relative humidity of

65 the environment, and the temperature at which it is exposed to. During times of crisis, both the CDC and other  
66 organizations including 3M, a major respirator manufacturer, have frequently cited ultraviolet germicidal  
67 irradiation, vaporous hydrogen peroxide, and moist heat as recommended methods for decontamination of  
68 FFRs (7-10). These methods, however, often call for specific equipment that may prove difficult to obtain  
69 and/or difficult to implement in many healthcare facilities and in the general public.

70 Heat is potentially more readily accessible than other methods of decontamination in many healthcare  
71 facilities. Although autoclaving (i.e., steam at  $\sim 121^{\circ}\text{C}$  and  $> 15$  psi) is a proven method of sterilization of most  
72 pathogens, it is not viable for decontamination of used N95 respirators because moist heat can degrade filter  
73 efficiency (11). In culture medium, SARS-CoV-2 has been reported to be inactivated by dry heat treatment in  
74 as little as 5 minutes at  $70^{\circ}\text{C}$  (12) and exposure of SARS Cov-2 on surfaces to dry heat at  $>70^{\circ}\text{C}$  for  $>30$   
75 minutes is sufficient to achieve a  $\geq 3$ -log reduction of viral titers, meeting FDA recommendations for FFR reuse  
76 (13-15).

77 While several reports have evaluated the impact on filtration as a measurement of preservation of  
78 respirator function after decontamination (16), the equally important fact of maintaining proper fit to the  
79 wearer's face has been understudied. Per both the National Institute for Occupational Safety and Health Part  
80 84 Title 42 of the Code of Federal Regulations (NIOSH 42 CFR 84) and the FDA, respirators must be  
81 assessed for not only filter performance, but also fit, i.e., the sealant performance between mask on the  
82 individual's face. Respirator mask fit testers such as the TSI PortaCount Pro 8048 are employed to rapidly  
83 obtain OSHA compliant fit factors that quantitatively evaluate whether a respirator fits properly on an  
84 individual's face. The fit factor is derived by comparing particle counts outside the mask with ones inside the  
85 mask. Clearly, the mask fit test only passes if filtration material and sealant to face are in order. In other words,  
86 if the mask fit test is successful, it implicitly means that also the filtration material is operating satisfactorily. If  
87 the mask fit test fails (fit factor  $< 100$ ), it can either mean that the mask-to-face seal or filtration material failed  
88 (17). Thus, a successful mask fit test implies that a given decontamination method is not altering the filtration  
89 material and mask fit significantly.

90 In the current study, we demonstrate the complete inactivation of SARS-CoV-2 and preservation of fit  
91 test performance of N95 respirators following treatment with dry heat. We apply scanning electron microscopy  
92 with energy dispersive X-ray spectroscopy (SEM/EDS), X-ray diffraction (XRD) measurements, Raman

93 spectroscopy, and contact angle measurements to analyze filter material changes as a consequence of  
94 different decontamination treatments. We further compared the integrity of the respirator after autoclaving  
95 versus dry heat treatment via quantitative fit testing and found that autoclaving, but not dry heat, causes the fit  
96 of the respirator onto the users face to fail, thereby rendering the decontaminated respirator unusable. Our  
97 findings highlight the importance to account for both efficacy of disinfection and mask fit when reprocessing  
98 respirators to for clinical redeployment.

## 100 Materials and Methods

### 102 N95 Respirators

103 The class N95 filtering facepiece respirators chosen for this study include respirators typically used in large  
104 health care facilities:

- 105 • 3M™ Health Care Particulate Respirator and Surgical Mask 1860
- 106 • 3M™ Aura™ Health Care Particulate Respirator and Surgical Mask 1870+
- 107 • Bacou Willson 801 Respirator
- 108 • BLS 120B FFP1

### 110 Heat Treatment

111 N95 respirators were placed in a paper bag and sealed with a piece of heat-stable tape (**Fig 1**). The  
112 bags were placed onto a metal rack which was loaded into a TPS Gruenberg truck-in oven. Unless otherwise  
113 specified, all N95 respirators were treated for four cycles at either 80°C for 60 minutes or 100°C for 30 minutes,  
114 with at least 10 minutes of cooling time to room temperature in between. Autoclaved respirators were  
115 subjected to a single cycle of 121°C at 15-25 psi for 30 minutes.

117 **Figure 1. N95 respirators heat treatment pipeline.** Dry heat treatment pipeline that can be potentially scaled  
118 to hundreds of masks per cycle.

## 120 SARS-CoV-2 Thermal Stability

121 The SARS-CoV-2 isolate USA-WA1/2020 was obtained from BEI Resources and used for the  
122 experiments in this study. VeroE6 cells were obtained from ATCC and used to titer and passage the SARS-  
123 COV-2 virus. VeroE6 cells were routinely cultured in DMEM containing Glutagro (Corning) and 8% Fetal  
124 Bovine Serum (FBS) at 37°C with 5% CO<sub>2</sub>. All growth and manipulations of the SARS-CoV-2 virus were  
125 performed under BSL3 containment conditions.

126 Approximately 5 x 10<sup>5</sup> PFU of SARS-CoV-2 virus in DMEM was spotted in triplicate onto a N95 mask  
127 for each condition and the masks were left to dry within the biosafety cabinet for 2 hours at room temperature.  
128 N95 masks containing SARS-COV-2 virus were either left at room temperature or treated with dry-heat using a  
129 TPS/Tenney T2 series (Tenney Environmental) small dry-heat sterilizer for the indicated time and temperature.  
130 As a negative control, N95 masks were treated similarly with DMEM media alone and left at room temperature  
131 during heat treatment.

## 133 Virus recovery and quantification

134 SARS-CoV-2 virus was recovered by cutting each virus-treated spot, including all three mask layers,  
135 from each N95 mask and placing each spot in an Eppendorf screw-cap tube containing 1 mL DMEM plus 10  
136 units/ml penicillin, 10 µg/ml streptomycin, and 1 µg/ml amphotericin B. Samples were submerged and  
137 incubated for 5 minutes at room temperature then rocked gently by hand for 5 minutes to recover virus. Plaque  
138 assays were performed to quantify the amount of virus recovered by performing serial dilutions of recovered  
139 virus and infecting VeroE6 cells seeded at 4.5x10<sup>5</sup> cells/well in a 6-well tissue culture treated plate for one  
140 hour. Cells were then overlaid with DMEM containing 0.8% tragacanth gum, 2.5% FBS, 10 units/ml penicillin,  
141 10 µg/ml streptomycin, and 1 µg/ml amphotericin B and incubated at 37°C with 5% CO<sub>2</sub> for 48 hours. To  
142 quantify the amount of virus recovered, the overlay was removed, and the plaques were visualized by staining  
143 VeroE6 cells with 0.5% crystal violet and 0.8% glutaraldehyde in 50% methanol for 10 minutes followed by  
144 several washes with distilled water. Total PFU/mL for each condition was calculated by averaging the mean  
145 PFU/mL recovered for each biological replicate (n=3).

## N95 FFR Quantitative Fit Tests

A PortaCount Pro 8048 (TSI, Shoreview, MN) was used to obtain OSHA compliant quantitative fit factors at Stony Brook University Hospital, in the Department of Occupational Health and Safety (17). The most penetrating particle size (MPPS) for most N95 FFRs is around 300 nm (18-22). For this reason, the quantitative fit testing protocols evaluate leakages at particle size ranges outside of the MPPS to be more sensitive to leakages across the sealant between mask and face. The principle of operation is to choose a particle size, typically about 40 nm, that is filtered with great efficiency due to electrostatic interactions and to compare the number concentration of those particles outside the mask (i.e. ambient air), the particle concentration inside the mask (23, 24). Detection of those particles is achieved by a condensation particle counters (CPC) that grows these small particles via condensation of vapor to size detectable via light scattering. Quantitative fit testing was performed on the same operator for all mask types and for all conditions: dry heat treated (n = 3), untreated (n = 1), and autoclaved (n = 1) respirators.

Quantitative fit testing procedures for N95 respirators were performed according to Occupational Safety and Health Administration (OSHA) guidelines found in Appendix A to §1910.134. N95 respirators were fitted with a mask sampling adapter that allows for the measurement of particles inside the respirator while donned by an individual. Four exercises were performed (**Table 1**) and fit factors for each exercise were calculated by taking the ratio of the concentration of ambient particles to the concentration of particles inside the respirator. The overall fit factor is calculated as the ratio of the # of exercises to the sum of the reciprocal of the fit factors for each exercise. Overall fit factor scores of  $\geq 100$  passes OSHA guidelines.

$$\text{Overall Fit Factor} = \frac{n}{\sum_{k=1}^n \frac{1}{\text{FitFactor}_n}}$$

**Table 1. Description of OSHA guidelines on quantitative respirator fit testing procedures.**

| Exercises       | Exercise Procedure                                                               | Measurement Procedure                                  |
|-----------------|----------------------------------------------------------------------------------|--------------------------------------------------------|
| 1) Bending Over | Bend at the waist, as if going to touch their toes for and inhale 2 times at the | 20 second ambient sample, followed by a 30 second mask |

|                      | bottom.                                                                                                 | sample.                                                       |
|----------------------|---------------------------------------------------------------------------------------------------------|---------------------------------------------------------------|
| 2) Talking           | The test subject will recite the Rainbow Passage loud enough to be heard by another person in the room. | 30 second mask sample.                                        |
| 3) Head Side-to-Side | Turn head from side to side for and inhale 2 times at each extreme.                                     | 30 second mask sample.                                        |
| 4) Head Up-and-Down  | Slowly move head up and down for inhale 2 times at each extreme.                                        | 30 second mask sample, followed by a 9 second ambient sample. |

169

170

171

172

173

174

If a TSI Portacount Pro 8048 instrument is not available for mask fit testing, in the supplement we have outlined procedures on how a scanning mobility particle sizer spectrometer (SMPS) consisting of a differential mobility analyzer (DMA) and condensation particle counter (CPC) could be used to estimate fit factors (.

### Filtration Material Characterization

175

176

177

178

179

Representative samples of mask materials were obtained by cutting portions of untreated, dry air heat treated, and steam heat treated (autoclaved) masks. Prior to SEM, Raman, and XRD measurements, both the Bacou Willson 801 N95 and 3M 1860 N95 mask material samples were mechanically separated into three layers using forceps, where layer 1 is the outside layer (farthest from the mask wear), layer 2 is the middle meltblown layer and layer 3 is the inside layer (closest to the mask wearer).

180

181

182

183

*Scanning electron microscopy (SEM)* images were collected using a high-resolution SEM (JEOL 7600F) instrument. SEM images were acquired at an accelerating voltage of 5 kV. A thin layer of silver (Ag) 10 nm in thickness was applied to the mask materials prior to SEM imaging to reduce sample charging. Raman.

184

185

186

*Raman spectra* of the pristine and treated mask materials were recorded on a Horiba Scientific XploRA instrument with a 532 nm laser at 10% intensity using a 50X objective and a grating of 1,200 lines/mm. The spectra were calibrated with a Si standard.

187

188

189

An artificial saliva (AS) solution was prepared with 0.844 mg/L NaCl, 1.200 mg/L KCl, 0.146 mg/L anhydrous CaCl<sub>2</sub>, 0.052 mg/L MgCl<sub>2</sub>·6H<sub>2</sub>O, 0.342 mg/L K<sub>2</sub>HPO<sub>4</sub>, 60.00 mg/L 70% sorbitol solution, 3.5 mg/L hydroxyethyl cellulose in deionized water.

190

191

*Contact Angle Measurements.* The contact angle as function of time was determined by use of Kyowa DM-501 instrument and measured with half angle method. Each experiment was run for 10 duplicate trials,



192 using 20  $\mu$ L artificial saliva solution, and data points were recorded every 100 milliseconds for 10 minutes, and  
193 the volume change as function of time was determined using the droplet profile and Kyowa FAMAS software.

## 195 Statistical analysis

196 Viral titers were compared by calculating two-tailed *P* values using a Paired t test. Statistical analysis was  
197 performed using Prism 8 (GraphPad Software).

## 199 Results

### 200 SARS-CoV-2 thermal Stability on N95 Respirators

201 SARS-CoV-2 thermal stability on 3M Particulate Respirator 1860 N95 material was evaluated by  
202 spotting  $3 \times 10^5$  PFU of SARS-CoV-2 onto N95 respirators. After incubating the N95 respirators at 80°C for 60  
203 minutes,  $1 \times 10^3$  PFU of viable virus was recovered from the respirator, demonstrating a 2-log reduction of  
204 virus as compared to samples that were kept at room temperature. Treatment of the inoculated N95 respirators  
205 at 100°C however, returned no viable virus, demonstrating a  $\geq 5$ -log reduction of virus (**Fig 2**).

206  
207 **Figure 2. SARS-CoV-2 Thermal Stability on N95 Respirator Material.** SARS-CoV-2 was inoculated onto  
208 N95 respirators and were subsequently subjected to either 80°C of dry heat for 60 minutes or 100°C of dry heat  
209 for 30 minutes.

### 211 Quantitative Fit Testing of N95 Respirators

212 Quantitative fit testing was performed on four models of N95 respirators after autoclaving or dry heat  
213 incubation at either 100°C for 30 minutes or 80°C for 60 minutes. For all respirator types, autoclaving resulted  
214 in failed quantitative fit testing (fit factor < 100) (**Fig 3**). In contrast, dry heat incubation yielded passing fit test  
215 scores ( $\geq 100$ ) for all the respirators that passed quantitative fit testing prior to any treatment. None of the  
216 Bacou Willson 801 respirators passed quantitative fit testing, presumably due to poor fit on the user. It is  
217 notable, however, that masks which were autoclaved yielded a lower fit factor than either the untreated, 100°C,  
218 or the 80°C dry heat treatment groups (**Fig 3c**).



219

220 **Figure 3. Quantitative fit factors of N95 respirators.** Quantitative fit factors of N95 (a) 3M 1860, (b) 3M  
221 1870, (c) Bacou Willson 801, and (d) BLS 120B respirators, treated with dry heat at 100°C for 30' or 80°C for  
222 60' (n = 3), compared to untreated and autoclaved controls (n = 1).

223

## 224 Material Characterization of N95 Respirators

225 The mesoscale morphologies of 3M 1860 N95 were characterized by SEM before and after heat and  
226 autoclave treatment. The cross-section view was taken and application of EDS indicated that only carbon  
227 signal was detected at layers-1 and -2, while both carbon and oxygen were detected at layer-3 (**Fig 4a and Fig**  
228 **4b**). Layer-1 is ~300  $\mu\text{m}$  in thickness, with millimeter scale patterning, comprised of microfibers with a diameter  
229 ~20  $\mu\text{m}$  (**Fig 4c**). Layer-2 is ~300  $\mu\text{m}$  in thickness, comprised of microfibers with a diameter in the range of 1-  
230 10  $\mu\text{m}$  (**Fig 4d**). Layer-3 is ~1 mm in thickness, comprised of microfibers with a diameter ~30  $\mu\text{m}$ , and some  
231 defects were also observed (**Fig 4e**). The morphologies of the 100°C dry heat treatment (**Fig 4f-h**) and  
232 autoclave treatment (**Fig 4i-k**) of 3M 1860 N95 did not show obvious differences from SEM images.

233

234 **Figure 4. SEM characterizations of three layers in 3M 1860 N95.** (a-b) SEM/EDS images of cross section.  
235 (c-e) SEM images of top-down view of untreated 3M 1860 N95. (f-h) SEM images of top-down view of the of 3M  
236 1860 N95 after dry heat treatment at 100 °C for 4 cycles. (i-k) SEM images of top-down view of the of 3M 1860  
237 N95 after autoclaving treatment.

238

239 Raman spectra were obtained for all of the layers of the 3M 1860 respirator. The broad asymmetric band  
240 observed at approximately 830  $\text{cm}^{-1}$  apparently splits into two bands at 808 and 840  $\text{cm}^{-1}$  upon crystallization.  
241 This indicates that the 830  $\text{cm}^{-1}$  band is a fundamental frequency of the chemical repeat unit that is altered by  
242 the symmetry of the helical chain conformation due to inter-molecular coupling between adjacent groups (25,  
243 26). The 810  $\text{cm}^{-1}$  band can be assigned to helical chains within crystals, while a broader band at  
244 840  $\text{cm}^{-1}$  assigned to chains in non-helical conformation (27).

245

246 Layer 1 showed significant fluorescence, as indicated by the broad peak features, possibly due to the  
dye used in this layer. Despite the strong fluorescence, a decrease in the ratio of two bands at 810 and 840  $\text{cm}^{-1}$

247 as well as the peak intensity at  $972\text{ cm}^{-1}$  after dry heat and autoclave treatment was noted, suggesting the  
248 shorting of the helical chain conformation of polypropylene after heat treatment (**Fig 5a**) (28). Notably, the peak  
249 at  $1220\text{ cm}^{-1}$  ascribed to the helical chain of 14 monomeric units of polypropylene suggested shorting of the  
250 helical chain length. Layer 2 (middle layer) and layer 3 (inner layer) (**Fig 5b and 5c**) also contain polypropylene  
251 fibers that are lower in crystallinity and narrower in thickness. X-ray diffraction (XRD) analysis was also performed  
252 to identify the composition and crystallinity of each layer before and after dry heat and autoclave treatment (**S1**  
253 **Fig**), showing no compositional changes and insignificant crystallite sizes changes after both types of treatment.

254  
255 **Figure 5. Raman spectra of three layers in 3M 1860 N95 mask material.** Spectra before dry heat, after dry  
256 heat, and autoclave heat treatment for the respective layers.

257  
258 Contact angle measurements were performed to characterize the wetting properties of surfaces of the  
259 mask materials towards artificial saliva solution. Wetting describes the ability of a liquid to remain in contact with  
260 a given surface, and its qualities are dominated by van der Waals forces (29). Contact angle data serves to  
261 indicate the degree of wetting when a liquid interacts with a solid. A contact angle greater than  $90^\circ$  suggests low  
262 wettability and poor contact of the fluid with the surface, resulting in a compact liquid droplet. Favorable wettability  
263 of surface evinces a contact angle less than  $90^\circ$  and the fluids will spread over a large area of the measured  
264 surface. Saliva substitutes have been studied and are used in lieu of biological samples (30).

265 For the 3M 1860 N95 material, both the dry heat and autoclaving treatments show an increase in the  
266 observed contact angle in comparison to that of the pristine samples, with measured initial contact angles of  
267  $103.9^\circ \pm 7.7^\circ$ ,  $105.4^\circ \pm 6.2^\circ$ , and  $96.0^\circ \pm 15.2^\circ$ , respectively (**S2 Fig**). The treated samples' contact angle values  
268 remain consistent over time, whereas the pristine sample showed a marked decrease. No significant differences  
269 in the droplet volume over time are observed for the three samples. For all three samples, the inner surface rate  
270 of absorption was too rapid to allow for measurements by contact angle with the  $20\ \mu\text{L}$  droplet being absorbed  
271 during the first 1 ms measurement interval.

272 In summary, material characterization of the N95 respirator material revealed some helical length  
273 shortening of the mask material and overall, no changes in neither the composition nor the crystallinity of any of  
274 the 3 layers of the respirator after dry heat treatment at  $100^\circ\text{C}$  or after autoclaving. Additionally, the contact angle

measurement of artificial saliva showed minimal changes in the behavior of liquid droplets on the respirator material under the same conditions. Taken together, it can be concluded that the filtration material itself was not much affected by either treatment. Material characterization was also performed on the Bacou Willson 801 respirator (**S4-7 Fig**) that showed similar results.

## Estimated Filtration

Our data suggests that 100 °C dry heat treatment does not appreciably impact the FFR material and that autoclaving similarly does not appreciably impact the filter material. Applying the measured fit factors, we can estimate the hypothetical decrease in filtration efficiency assuming a perfect fit (i.e., perfect seal between face and mask). As outlined above, the mask fit test makes use of particles in the size range of ~40 nm that are commonly filtered with an efficiency of about 99.99% (23). A fit factor of 100 and 200 corresponds to a filtration efficiency of 99 and 99.5% respectively (both imply passing of the fit test). As shown in Table 2, the estimated filtration efficiency for autoclaved masks drops significantly below those thresholds, by 1.04 to 7.73%, while the estimated filter efficiencies dropped by <1%, if at all, in the dry heat-treated groups.

**Table 2. Estimated filter efficiency derived from Fit Factors obtained from the PortaCount Pro 8048.**

| <b>Mask Type</b>  | <b>Condition</b> | <b>Estimated Filtration (%)</b> | <b>Δ Estimated Filtration (%)</b> |
|-------------------|------------------|---------------------------------|-----------------------------------|
| 3M 1860           | Untreated        | 99.50                           | –                                 |
| 3M 1870           | Untreated        | 99.48                           | –                                 |
| BLS 120B          | Untreated        | 99.50                           | –                                 |
| Bacou Willson 801 | Untreated        | 96.74                           | –                                 |
| 3M 1860           | Autoclaved       | 91.67                           | -7.83                             |
| 3M 1870           | Autoclaved       | 98.39                           | -1.11                             |
| BLS 120B          | Autoclaved       | 98.46                           | -1.04                             |
| Bacou Willson 801 | Autoclaved       | 90.00                           | -7.22                             |
| 3M 1860           | 100°C            | 99.50                           | 0.00                              |
| 3M 1870           | 100°C            | 99.48                           | -0.02                             |
| BLS 120B          | 100°C            | 99.50                           | 0.00                              |
| Bacou Willson 801 | 100°C            | 96.74                           | -0.48                             |
| 3M 1860           | 80°C             | 99.50                           | 0.00                              |
| 3M 1870           | 80°C             | 99.50                           | 0.00                              |
| BLS 120B          | 80°C             | 99.50                           | 0.00                              |
| Bacou Willson 801 | 80°C             | 96.67                           | -0.56                             |

## 292 Discussion

293 While most developed nations were able to deploy effective responses to mitigate supply chain  
294 shortages for PPE in the face of the COVID-19 pandemic, many parts of the world are still forced to reuse N95  
295 respirators even after exposure to symptomatic patients (4, 31). PPE shortages, including limited supplies of  
296 N95-grade respirator masks, impacts a diverse set of healthcare facilities, from hospitals to nursing homes.  
297 The CDC acknowledges these shortages and offers guidance, based on an institutions' burn rate (i.e., the rate  
298 at which N95 FFRs are used and disposed of) and crisis capacity strategies, whether N95 respirators are  
299 recommended for reuse and what methods for decontamination are authorized. The data in the current study  
300 offers an alternative and potentially more accessible method for decontamination of N95 respirators for reuse  
301 during crisis capacity. As the CDC recommends, limited FFR reuse should only be attempted when respirators  
302 are unsoiled, fit properly, and are undamaged (e.g., the straps and nosepiece are still intact and functional).

303 Consistent with previous studies, we observed a 2-log reduction of SARS-CoV-2 titer after treatment at  
304 80°C for 60 minutes and undetectable virus following treatment at 100°C for 30 minutes, meeting the minimum  
305 previously suggested 5-log reduction in virus by the FDA (13-15). Respirators subjected to dry heat maintained  
306 their gross structural integrity and the functionality of their straps and nosepieces after 4 cycles of sterilization.  
307 Similarly, dry heat sterilization after 4 cycles did not affect their fit as measured by quantitative fit testing. In  
308 contrast, autoclaved N95 respirators appeared to have some physical damages in the overall structure and  
309 shape of the respirators and failed quantitative fit testing in all respirator types tested. These results after  
310 autoclaving are consistent with other reports on most N95 respirator types that show degradation of the  
311 respirators (7, 13, 32).

312 Material characterization of 3M 1860 N95 respirators, performed by SEM, Raman spectroscopy, and  
313 XRD analysis, revealing some helical chain shortening, but no compositional or crystallite size changes in the  
314 microscopic structure of the 3 layers of the respirator after dry heat treatment. Similarly, autoclaving did not  
315 reveal any major changes in the material of the N95 respirator material. Contact angle characterization were  
316 also performed to evaluate any potential changes in the response to contact to liquids. The results demonstrated  
317 that the droplet volume remained consistent after either dry heat treatment or autoclave, although there was a  
318 slight increase in the contact angle after autoclave and dry heat treatment, suggesting that the absorption of

liquids decreased after contact. Material characterization was also performed on the Bacou Willson 801 respirator (**S4-7 Fig**) that revealed similar results.

Our data suggests that 100 °C dry heat treatment does not significantly impact the fit or the material of the N95 respirators. Notably, the Bacou Willson 801 respirators failed quantitative fit testing of a single subject under all conditions, despite being a NIOSH approved N95 FFR. These respirators may fit another user better, thus potentially yielding passing fit test scores. These results emphasize the importance to conduct individual fit tests after decontamination procedures as typically required in a health care setting. By comparison, all autoclaved respirators failed fit testing, despite having minimal changes in the material quality. Autoclaved masks failed the mask fit test and suggested that the change in filtration efficiency is up to 7.73%. However, the mask material analysis does not corroborate significant changes in the filtration material that could lead to these decreases in filtration efficiency. This points to the fact, that most likely, autoclaving the respirators led to changes in the mask fit by either altering the face mask mold, sealant, and/or straps. Taken together, these data suggest that autoclaving indeed has an impact on the fit of the respirator material. In combination with previous studies on the effects of autoclaving N95 respirators (13, 32) and their deleterious impact on both fit and filtration, the results confirm that autoclaving is not a consistently viable method for the decontamination of N95 respirators for their reuse.

Although we assessed the function of decontaminated masks by quantitative fit testing and material characterization, our study does not directly distinguish whether failed fit testing is due to the impairment of the filtration efficiency, including any impact on the electret properties of N95 respirators (16), or due to the failure of fit or some combination of both fit and filtration, although our data suggests that impact on fit as the most likely cause. In summary, dry heat sterilization is a potentially scalable, accessible, and effective method of decontaminating N95 respirators for up to 4 cycles in times of crisis and PPE shortages.

## Acknowledgement

We especially appreciate Ellen O'Hare and Kathy Terwilliger for assisting with the quantitative fit testing. We appreciate Emily Costa and Josephine Aller for assisting with SMPS measurements. We would also like to acknowledge Tenny Environmental, New Columbia, PA for the use of the use of a T2 series small dry-heat sterilizer for disinfection studies.

## 347 References

- 348 1. Liu Y, Ning Z, Chen Y, Guo M, Liu Y, Gali NK, et al. Aerodynamic analysis of SARS-CoV-2 in two Wuhan  
349 hospitals. *Nature*. 2020;582(7813):557-60.
- 350 2. Meselson M. Droplets and Aerosols in the Transmission of SARS-CoV-2. *New England Journal of*  
351 *Medicine*. 2020.
- 352 3. Ranney ML, Griffeth V, Jha AK. Critical supply shortages—the need for ventilators and personal  
353 protective equipment during the Covid-19 pandemic. *New England Journal of Medicine*. 2020;382(18):e41.
- 354 4. Cohen J, van der Meulen Rodgers Y. Contributing factors to personal protective equipment shortages  
355 during the COVID-19 pandemic. *Preventive Medicine*. 2020:106263.
- 356 5. Control CfD, Prevention. Implementing filtering facepiece respirator (FFR) reuse, including reuse after  
357 decontamination, when there are known shortages of N95 respirators. Updated August 4, 2020.
- 358 6. Mondelli MU, Colaneri M, Seminari EM, Baldanti F, Bruno R. Low risk of SARS-CoV-2 transmission by  
359 fomites in real-life conditions. *The Lancet Infectious Diseases*. 2021;21(5):e112.
- 360 7. Kumar A, Kasloff SB, Leung A, Cutts T, Strong JE, Hills K, et al. Decontamination of N95 masks for re-use  
361 employing 7 widely available sterilization methods. *PloS one*. 2020;15(12):e0243965.
- 362 8. Jatta M, Kiefer C, Patolia H, Pan J, Harb C, Marr LC, et al. N95 reprocessing by low temperature  
363 sterilization with 59% vaporized hydrogen peroxide during the 2020 COVID-19 pandemic. *American Journal of*  
364 *Infection Control*. 2021;49(1):8-14.
- 365 9. Fisher EM, Shaffer RE. A method to determine the available UV-C dose for the decontamination of  
366 filtering facepiece respirators. *Journal of applied microbiology*. 2011;110(1):287-95.
- 367 10. 3M. Decontamination of 3M Filtering Facepiece Respirators, such as N95  
368 Respirators, in the United States - Considerations. 2021.
- 369 11. Liao L, Xiao W, Zhao M, Yu X, Wang H, Wang Q, et al. Can N95 respirators be reused after disinfection?  
370 How many times? *ACS nano*. 2020.

- 371 12. Chin A, Chu J, Perera M, Hui K, Yen H-L, Chan M, et al. Stability of SARS-CoV-2 in different environmental  
372 conditions. *MedRxiv*. 2020.
- 373 13. Fischer RJ, Morris DH, van Doremalen N, Sarchette S, Matson MJ, Bushmaker T, et al. Effectiveness of  
374 N95 respirator decontamination and reuse against SARS-CoV-2 virus. *Emerging infectious diseases*.  
375 2020;26(9):2253.
- 376 14. Campos RK, Jin J, Rafael GH, Zhao M, Liao L, Simmons G, et al. Decontamination of SARS-CoV-2 and other  
377 RNA viruses from N95 level meltblown polypropylene fabric using heat under different humidities. *ACS nano*.  
378 2020;14(10):14017-25.
- 379 15. FDA. Recommendations for Sponsors Requesting EUAs for Decontamination and Bioburden Reduction  
380 Systems for Surgical Masks and Respirators During the Coronavirus Disease 2019 (COVID19) Public Health  
381 Emergency. 2020.
- 382 16. Yim W, Cheng D, Patel SH, Kou R, Meng YS, Jokerst JV. KN95 and N95 Respirators Retain Filtration  
383 Efficiency despite a Loss of Dipole Charge during Decontamination. *ACS applied materials & interfaces*.  
384 2020;12(49):54473-80.
- 385 17. Safety O, Administration H. Appendix A to § 1910.134: fit testing procedures (mandatory). 2021.
- 386 18. Chen C-C, Lehtimäki M, Willeke K. Aerosol penetration through filtering facepieces and respirator  
387 cartridges. *American Industrial Hygiene Association Journal*. 1992;53(9):566-74.
- 388 19. He X, Reponen T, McKay RT, Grinshpun SA. Effect of particle size on the performance of an N95 filtering  
389 facepiece respirator and a surgical mask at various breathing conditions. *Aerosol Science and Technology*.  
390 2013;47(11):1180-7.
- 391 20. Martin Jr SB, Moyer ES. Electrostatic respirator filter media: filter efficiency and most penetrating  
392 particle size effects. *Applied occupational and environmental hygiene*. 2000;15(8):609-17.
- 393 21. Bałazy A, Toivola M, Adhikari A, Sivasubramani SK, Reponen T, Grinshpun SA. Do N95 respirators provide  
394 95% protection level against airborne viruses, and how adequate are surgical masks? *American journal of*  
395 *infection control*. 2006;34(2):51-7.



- 396 22. Qian Y, Willeke K, Grinshpun SA, Donnelly J, Coffey CC. Performance of N95 respirators: filtration  
397 efficiency for airborne microbial and inert particles. *American Industrial Hygiene Association Journal*.  
398 1998;59(2):128-32.
- 399 23. Halvorsen T. Fit testing using size-selected aerosol. Shoreview, MN USA: TSI Application Note ITI-062.  
400 1998.
- 401 24. TSI. Mechanisms of filtration for high efficiency fibrous filters. Application Note ITI-041, TSI  
402 Incorporated. 2005.
- 403 25. Nielsen AS, Batchelder D, Pyrz R. Estimation of crystallinity of isotactic polypropylene using Raman  
404 spectroscopy. *Polymer*. 2002;43(9):2671-6.
- 405 26. Wang X, Michielsen S. Isotactic polypropylene morphology–Raman spectra correlations.  
406 2001;82(6):1330-8.
- 407 27. Nielsen AS, Batchelder DN, Pyrz R. Estimation of crystallinity of isotactic polypropylene using Raman  
408 spectroscopy. *Polymer*. 2002;43(9):2671-6.
- 409 28. Hiejima Y, Takeda K, Nitta K-h. Investigation of the Molecular Mechanisms of Melting and Crystallization  
410 of Isotactic Polypropylene by in Situ Raman Spectroscopy. *Macromolecules*. 2017;50(15):5867-76.
- 411 29. Y. Y, T.R. L. Contact Angle and Wetting Properties. G. B, G. B, editors. Berlin, Heidelberg.: Springer; 2013.
- 412 30. Lysik D, Niemirowicz-Laskowska K, Bucki R, Tokajuk G, Mystkowska J. Artificial Saliva: Challenges and  
413 Future Perspectives for the Treatment of Xerostomia. *Int J Mol Sci*. 2019;20(13).
- 414 31. Mehrotra P, Malani P, Yadav P, editors. Personal protective equipment shortages during COVID-19—  
415 supply chain–related causes and mitigation strategies. *JAMA Health Forum*; 2020: American Medical  
416 Association.
- 417 32. Grinshpun SA, Yermakov M, Khodoun M. Autoclave sterilization and ethanol treatment of re-used  
418 surgical masks and N95 respirators during COVID-19: impact on their performance and integrity. *Journal of*  
419 *Hospital Infection*. 2020;105(4):608-14.

- 420 33. Guo X, Lin Z, Wang Y, He Z, Wang M, Jin G. In-Line Monitoring the Degradation of Polypropylene under  
421 Multiple Extrusions Based on Raman Spectroscopy. *Polymers (Basel)*. 2019;11(10):1698.
- 422 34. Hager E, Farber C, Kurouski D. Forensic identification of urine on cotton and polyester fabric with a hand-  
423 held Raman spectrometer. *Forensic Chemistry*. 2018;9:44-9.

## 425 Supporting information

426

427 **S1 Fig. XRD of three layers in 3M 1860 N95 before and after dry heat and autoclaving.** Compared with the  
428 XRD patterns of the pristine masks (black), after dry air treatment (red) and autoclave/steam treatment (blue),  
429 the 3M 1860 N95 mask materials showed no compositional changes and insignificant crystallite sizes changes  
430 after both types of thermal treatment. Specifically, the respective crystallite sizes of the pristine, dry air treated  
431 and steam treated layer are 15, 17 and 14 nm for layer 1 (**Figure S1a**); and 11, 11 and 8 nm for layer 2 (**Figure**  
432 **S1b**). This indicated that dry air treatment slightly increased the crystallize size at layer 1 with no significant  
433 change at layer 2. Interestingly, steam treatment decreased crystallite size for both layers 1 and 2 for the 3M  
434 1860 N95 mask materials. No crystallite size was calculated for layer 3 due to its more amorphous character  
435 with significant peak overlap, and no obvious change was observed on layer-3 between the pristine and heat-  
436 treated samples (**Figure S1c**).

437

438 **S2 Fig. Contact angle measurements of 3M 1860 N95 respirator material.** In contact angle measurements  
439 for the 3M 1860 N95 material, both the dry heat and steam treatments show an increase in the observed contact  
440 angle in comparison to that of the pristine, which evince an initial contact angle of  $103.9^{\circ} \pm 7.7^{\circ}$ ,  $105.4^{\circ} \pm 6.2^{\circ}$ , and  
441  $96.0^{\circ} \pm 15.2^{\circ}$ , respectively. The treated samples' contact angle values remain consistent over time, whereas the  
442 pristine sample showed a marked decrease. No significant difference is shown between the droplet volume over  
443 time for the three samples. This observation suggests that the wettability of the pristine sample increases over  
444 time, but this behavior is ameliorated by the dry heat and steam treatments. For all three samples, the inner  
445 surface rate of absorption was too rapid to allow for measurements by contact angle with the 20  $\mu$ l droplet being  
446 absorbed during the first 1000  $\mu$ s measurement interval.

447

448 **Supplemental Figure 3. Fit factor calculations derived from SMPS measurements of N95 respirators.** We  
449 derived the fit factor as defined in OSHA guidelines (see Methods section). Upper and lower bounds of the fit  
450 factor assumed the most conservative count estimates applying measured counts and their corresponding count  
451 error. Most conservative signifies, e.g., the greatest number of 40 nm particle in room air (including count  
452 uncertainty) over lowest number of 40 nm particles in respirator (subtracting count uncertainty).

453

454 **Supplemental Figure 4.** SEM characterizations of three layers in Bacou Willson 801 N95. **(a-b)** SEM images of  
455 cross section. **(c-e)** SEM images of top down view of pristine Bacou Willson 801 N95. **(f-h)** SEM images of top  
456 down view of the of Bacou Willson 801 N95 after heat treatment at 100 °C for 4 cycles. **(i-k)** SEM images of top  
457 down view of the of Bacou Willson 801 N95 after steam treatment. The morphologies of dry air heat treatment  
458 and steam (autoclave) treatment do not show obvious difference from SEM images, which indicates the  
459 morphologies are not changed under the dry air heat treatment and steam treatment methods used.

460

461 **Supplemental Figure 5. XRD of three layers in Bacou Willson 801 N95 material.** XRD of three layers in  
462 Bacou Willson 801 N95 **(a-c)** before and after dry heat and steam heat treatment. The XRD patterns of layer 1  
463 and layer 2 indicated a semicrystalline character, and as marked therein, the major diffraction patterns were  
464 indexed to reflections from (110), (045), (130) and (-131) planes of the polypropylene phase (PDF #50-2397).  
465 Layer 1 showed larger crystallite size (16 nm) than layer 2 (4 nm), indicating layer 1 is more crystalline than layer  
466 2 in the pristine mask (**S5a-b**, black curves). However, in layer-2 an extra peak at  $2\theta=20.07$  was evident (**S5b**),  
467 corresponding to the (111) peak of polypropylene. The XRD patterns of the layer-3 also indicated a  
468 semicrystalline character, and as marked therein, the major diffraction patterns were indexed to reflections from  
469 the (010), (-110) and (100) planes of the polyester phase (PDF #50-2275) (**S5c**). Compared with the XRD  
470 patterns of pristine (untreated) Bacou Willson 801 N95 (black curve), the XRD patterns after dry air treatment  
471 (red) and steam treatment (blue) indicate higher crystallinity for layers 1 and 2 (**S5-b**). Specifically, the crystallite  
472 sizes of the respective pristine, dry heat treated, and steam treated 16, 18 and 19 nm for layer 1 (**S5a**) and 4, 8  
473 and 12 nm for layer 2 (**S5a**). This indicated that steam treatment increases crystallite size more than dry air  
474 treatment at both layer 1 and layer 2, and the dry air treatment and steam treatment has more effect on

475 crystallinity of layer 2 than layer 1. Layer 3 is more amorphous with significant peak overlap, so no crystallite  
476 size was calculated on layer 3, but an extra peak at  $2\theta=48.36$  were observed after dry air and steam treatment,  
477 which corresponds to the (200) peak of polyester. (S5c).

478  
479 **Supplemental Figure 6. Raman spectra of three layers in Bacou Willson 801 N95 FFR before and after**  
480 **dry air and steam heat (autoclave) treatment.** Based on the acquired Raman spectra, layer 1 and 2 of Bacou

481 Willson 801 N95 (S6a & c) have spectra features resembling polypropylene materials. After the dry air and steam  
482 treatment, the ratio of the two bands at 810 and 840  $\text{cm}^{-1}$  layer 1 decreased, along with the decreasing intensity  
483 of the 972  $\text{cm}^{-1}$  peak (S6a), as highlighted in the yellow dashed regions, suggesting a shorting of the helical  
484 chain conformation of polypropylene after heat treatment (28). The regularity bands at 973, 998, 841, and 1220  
485  $\text{cm}^{-1}$  were previously assigned to the helical chains of 5, 10, 12, 14 monomeric units of polypropylene,  
486 respectively. The 2<sup>nd</sup> layer of the Bacou Willson 801 N95 material (S6) showed broader and weaker peaks than  
487 those in layer 1, which potentially suggested lower crystallinity in this layer consistent with the narrower thickness  
488 of the fibers (33). No significant changes were noted after the heat treatment in this layer. The 3<sup>rd</sup> layer of the  
489 Bacou Willson 801 N95 mask can be assigned to polyester (S6c),(34) as indicated by the strong C=C stretching  
490 band (ring deformation) at 1615  $\text{cm}^{-1}$  and C=O stretching band at 1730  $\text{cm}^{-1}$ . Similarly, no significant differences  
491 in Raman spectra were observed in the bulk structure of layer 3 before and after heat treatment, suggesting  
492 minimal changes in crystallinity and bond orientation implying that layers 2 and 3 of Bacou Willson 801 N95  
493 mask are stable under heat treatment.

494  
495 **Supplemental Figure 7. Contact angle measurements of Bacou Willson 801 N95 material.** Contact angle  
496 and droplet volume over time of outer (a & b) and inner (c & d) surfaces of Bacou Willson 801 N95 before and  
497 after dry heat and steam treatment. There is not an observed significant difference between the contact angle of  
498 the pristine, dry heat treated, and steam treated Bacou Willson 801 N95 mask samples, which evince an initial  
499 contact angle of  $121.4^\circ \pm 12.6^\circ$ ,  $121.2^\circ \pm 9.5^\circ$ , and  $113.1^\circ \pm 8.3^\circ$ , respectively, and remain constant over time.  
500 Though the steam treated (autoclaved) sample shows the greatest reduction in contact angle, suggesting an  
501 increase in surface adsorption of the artificial saliva, this value still lies within the error of the pristine (untreated)  
502 measurement. Furthermore, the same similarity in surface absorption is shown by the observation of the volume

503 of the liquid droplet over time. Greater variability is observed when measurements are taken of the inner surfaces  
504 of the Bacou Willson 801 N95 mask samples, (**S7c & d**). Whilst there are no significant initial differences between  
505 the pristine and heat-treated samples,  $106.9^{\circ} \pm 6.8^{\circ}$  and  $111.9^{\circ} \pm 15.1^{\circ}$ , respectively, both samples show a  
506 decreasing trend over time. The most rapid decrease is observed within the pristine sample, which achieves a  
507 value of  $64.4^{\circ} \pm 15.2^{\circ}$  after 1 minute. This increase in surface adsorption and wettability of the inner surfaces is  
508 further supported by the increase rate of surface absorption suggest by negative slope of the volume over time  
509 figure. The steam treated sample rate of surface absorption was too rapid to allow for measurements by contact  
510 angle with the 20  $\mu$ l droplet being absorbed with first 1000  $\mu$ s measurement interval. The wetting properties of  
511 the inner mask to outer mask surfaces suggest the inner surfaces draw respiratory expulsions away from the  
512 user whereas the outer surfaces can repel respiratory expulsions toward the user from other sources. Dry heat  
513 treatments decrease the absorption of the inner layer; however, steam treatments induce a distinct increase of  
514 the absorption of the inner layer.

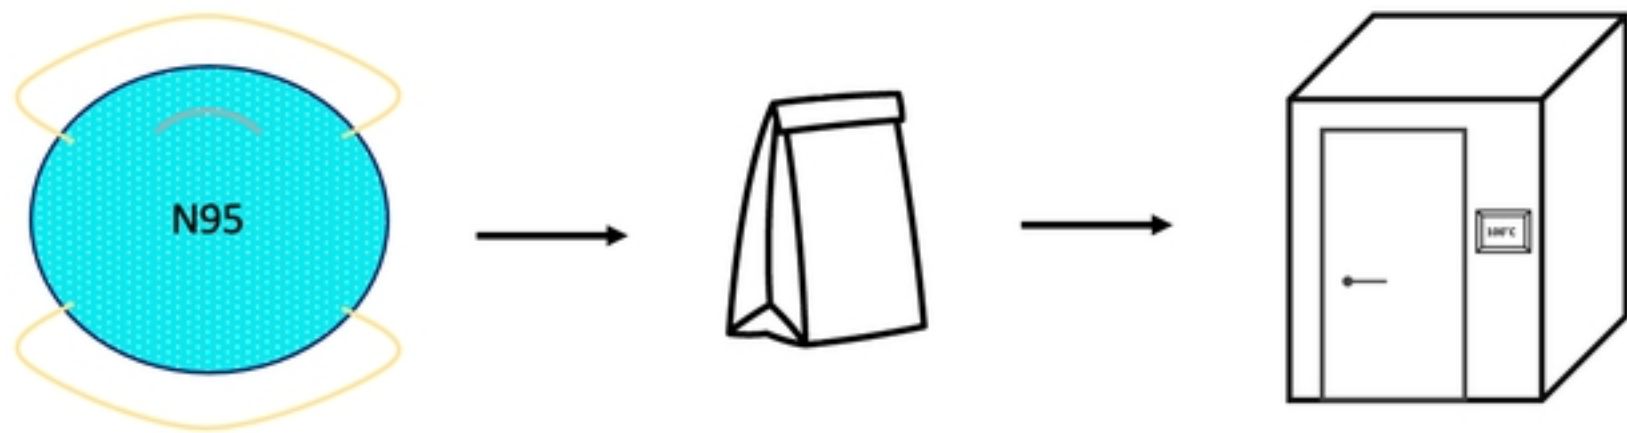

Figure 1

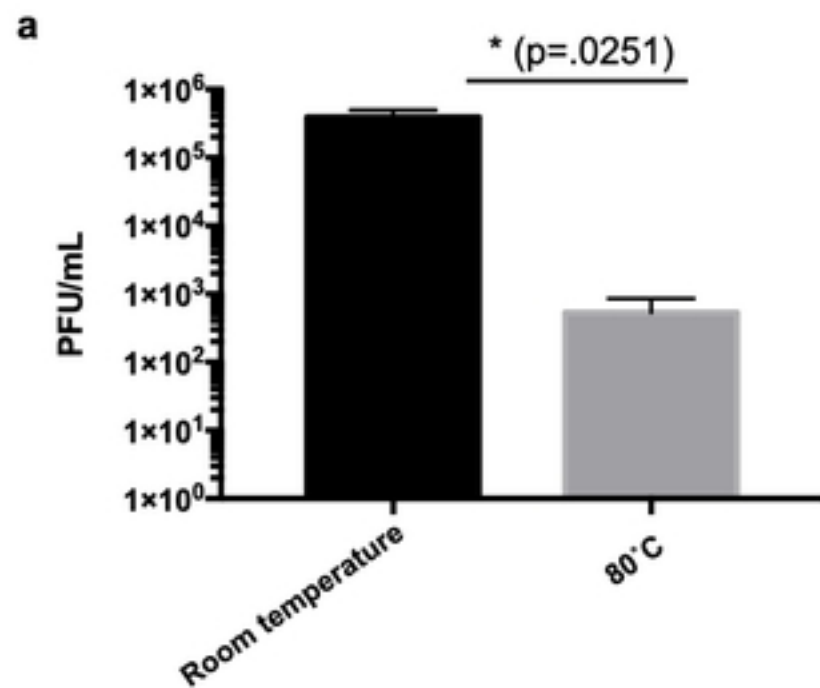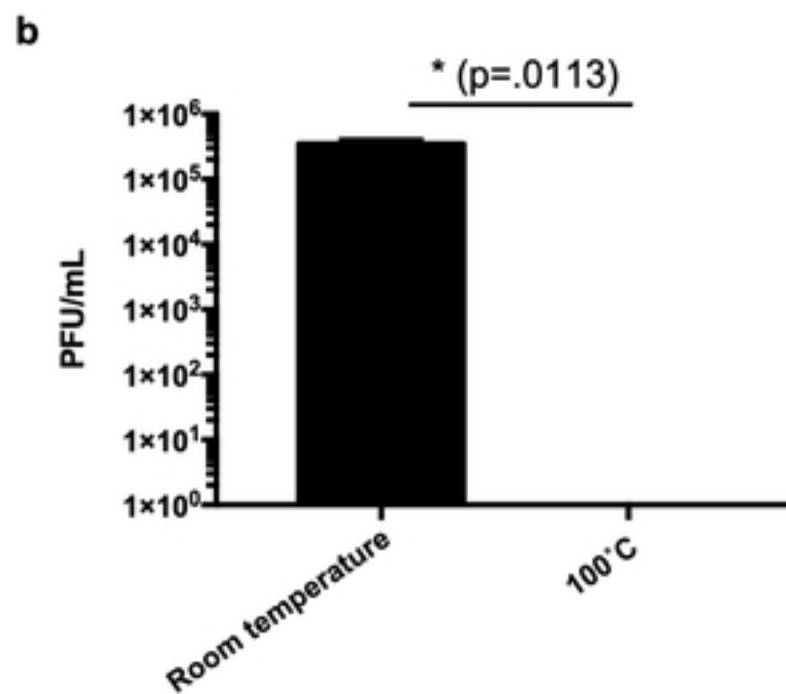

Figure 2



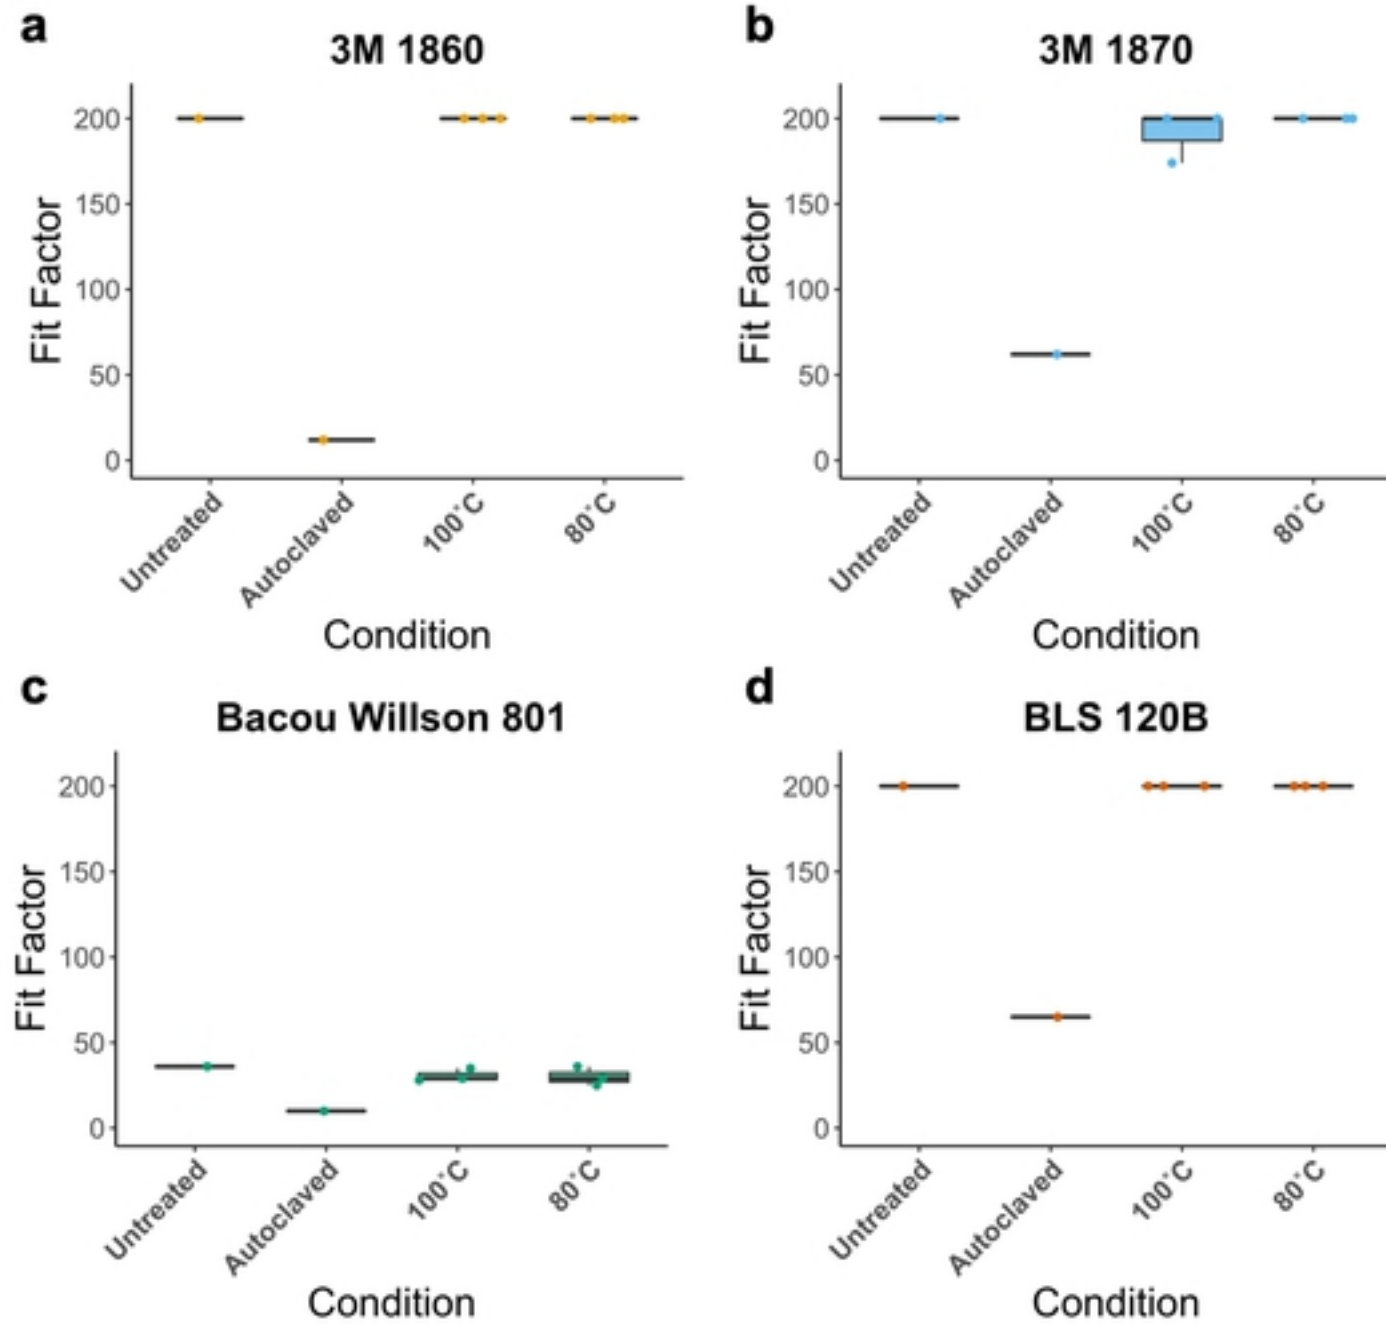

Figure 3

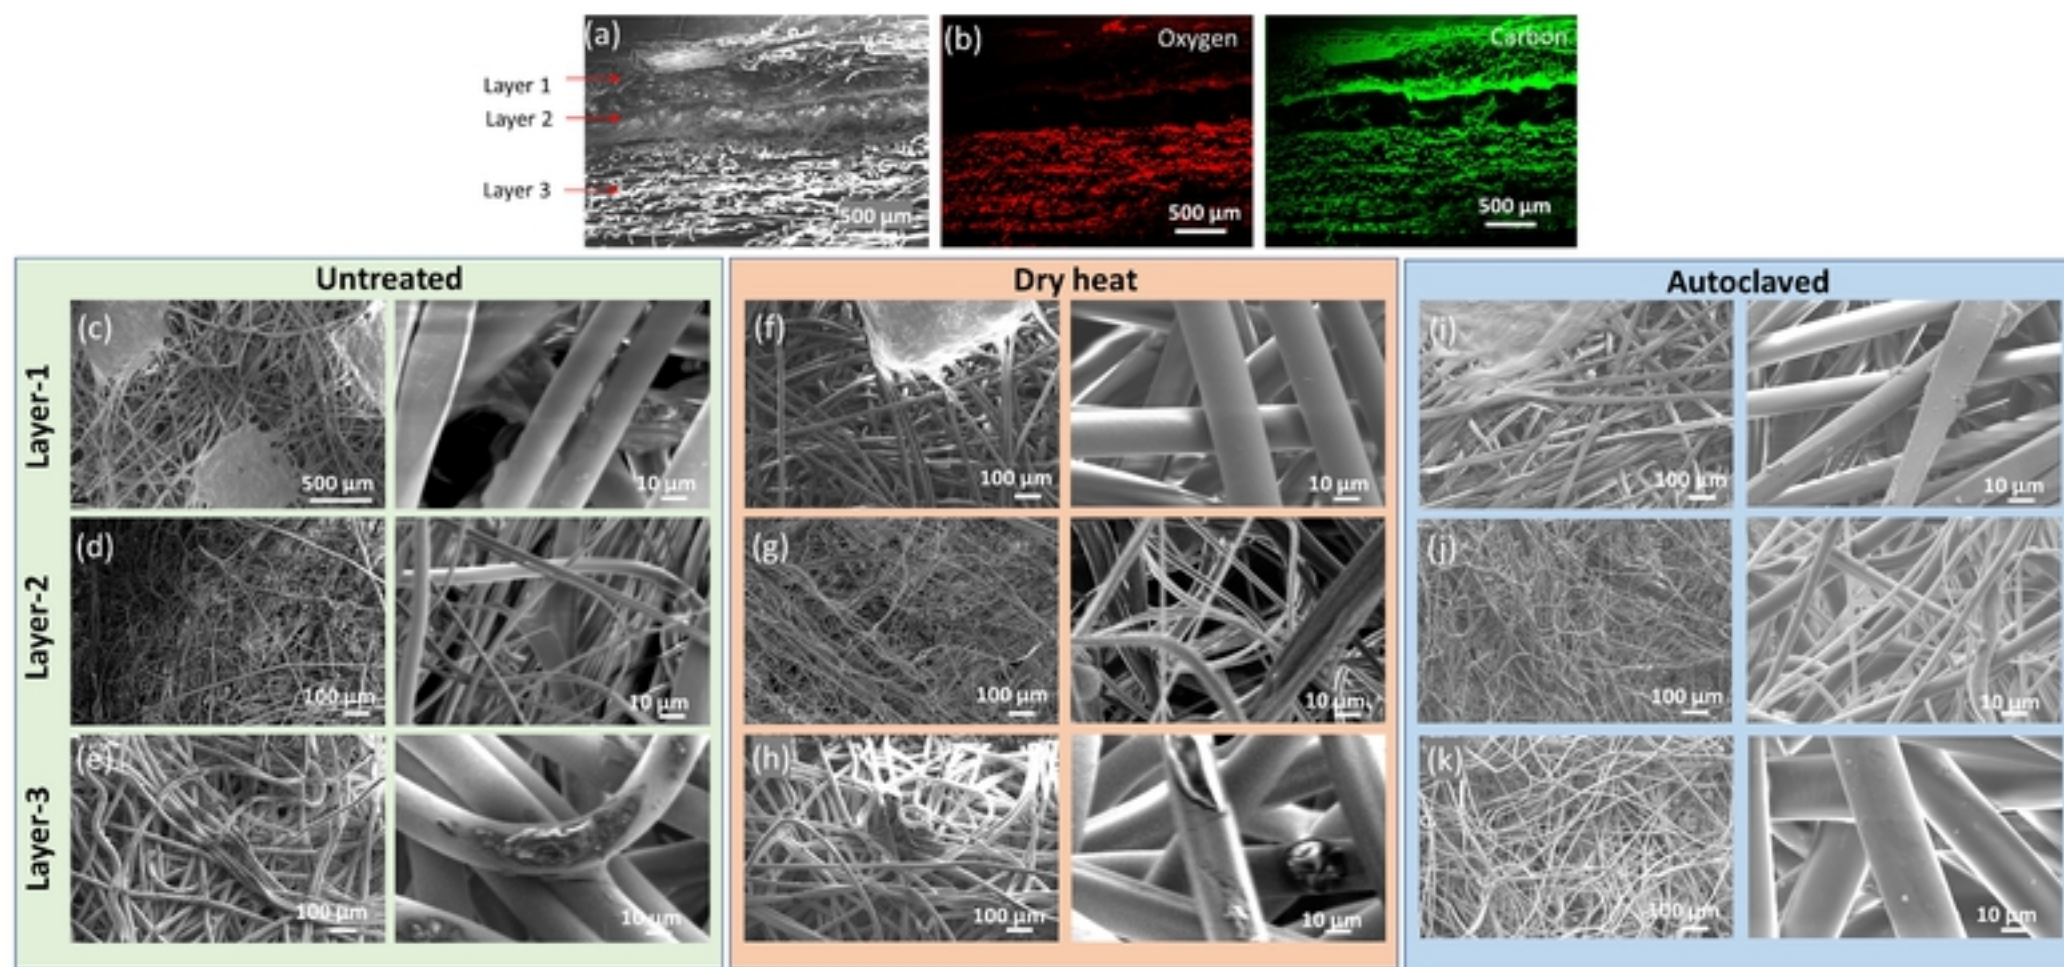

Figure 4

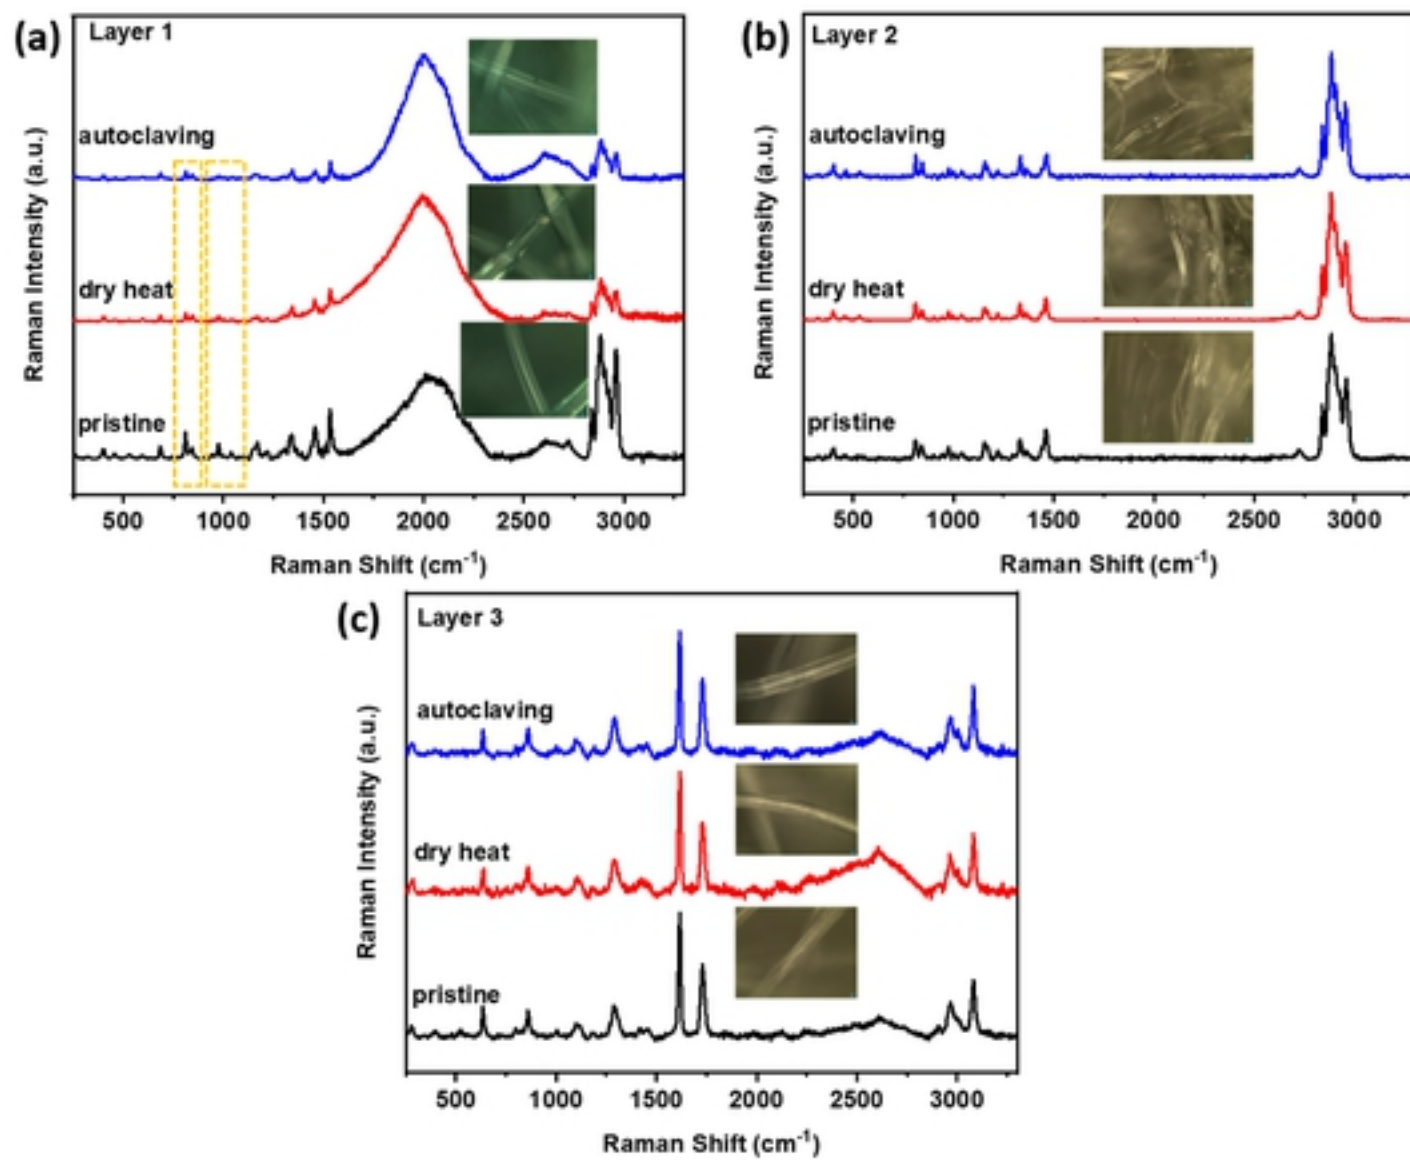

Figure 5
